## Correction: Predictive value of post-procedural early (within 24 h) increase in cystatin C for contrast-induced acute kidney injury and mortality following coronary angiography or intervention

Yong Liu<sup>1,\*</sup>, Kai-Hong Chen<sup>2,\*</sup>, Shi-Qun Chen<sup>1,3,\*</sup>, Li-Ling Chen<sup>1,2,\*</sup>, Chong-Yang Duan<sup>4,\*</sup>, Kun Wang<sup>1,5,\*</sup>, Xiao-Sheng Guo<sup>1</sup>, Hua-Long Li<sup>1</sup>, Wei-Jie Bei<sup>1</sup>, Kai-Yan Lin<sup>1,3</sup>, Ping-Yan Chen<sup>4</sup>, Ying Xian<sup>6</sup>, Ning Tan<sup>1</sup>, Ying-Ling Zhou<sup>1,3</sup>, Qing-Shan Geng<sup>1</sup> and Ji-Yan Chen<sup>1</sup>

<sup>1</sup> Department of Cardiology, Guangdong Cardiovascular Institute, Guangdong Key Laboratory of Coronary Disease Prevention, Guangdong General Hospital, Guangdong Academy of Medical Sciences, School of Medicine, South China University of Technology, Guangzhou, China

<sup>2</sup> Department of Cardiology, Longyan First Affiliated Hospital of Fujian Medical University, Longyan, Fujian Province, China

<sup>3</sup> Department of Cardiology, Guangdong General Hospital Zhuhai Hospital (Zhuhai Golden Bay Center Hospital), Zhuhai, Guangdong, China

<sup>4</sup> National Clinical Research Center for Kidney Disease, State Key Laboratory of Organ Failure Research, Department of Biostatistics, School of Public Health and Tropical Medicine, Southern Medical University, Guangzhou, China

<sup>5</sup> Southern Medical University, Guangzhou, Guangdong, China

<sup>6</sup> Duke Clinical Research Institute, Durham, NC, USA

\* These authors contributed equally to this work.

**Published:** February 05, 2018

**Copyright:** Liu et al. This is an open-access article distributed under the terms of the Creative Commons Attribution License 3.0 (CC BY 3.0), which permits unrestricted use, distribution, and reproduction in any medium, provided the original author and source are credited.

### Previous name:

<sup>3</sup> Department of Cardiology, Guangdong General Hospital Zhuhai Hospital, Zhuhai, Guangdong, China

### Current name:

<sup>3</sup> Department of Cardiology, Guangdong General Hospital Zhuhai Hospital (Zhuhai Golden Bay Center Hospital), Zhuhai, Guangdong, China

Original article: Oncotarget. 2017; 8:109762-109771. <https://doi.org/10.18632/oncotarget.19034>
